# Supplementary material for: Effect of compost and inorganic fertilizer on organic carbon and activities of carbon cycle enzymes in aggregates of an intensively cultivated Vertisol
Source: PLoS One. 2020 Mar 12;15(3):e0229644. doi: 10.1371/journal.pone.0229644 (PMC7067440; doi:10.1371/journal.pone.0229644)
Supplement: S1 Dataset — (XLSX) [file pone.0229644.s001.xlsx]

## Sheet: Fig. 1
raw data				Treatments	Soil organic C(g/kg)
Treatments	Soil organic C(g/kg)			CK	8.61
CK	8.61			FR	9.31974
CK	8.84			FRM	12.153
CK	8.38
FR	9.31974
FR	9.61185			Treatments	standard error of the mean (n = 3)
FR	9.02763			CK	0.23
FRM	12.153			FR	0.292109
FRM	12.6123			FRM	0.459294
FRM	11.6937
				Treatments	significant differences between treatments at P < 0.05
				CK	c
				FR	b
				FRM	a
								Fig. 1 Compost and inorganic fertilizer effects on the organic C content in the soil. Vertical bars denote the standard error of the mean (n = 3). Different letters a, b and c indicate significant differences between treatments at P < 0.05

## Sheet: Fig. 2
raw data
Treatments	Cellulase activity(mg/d/g)	Invertase activity(mg/d/g)	Urease activity(ug/d/g)	Catalase activity(umol/d/g)		Treatments	Cellulase activity(mg/d/g)	standard error of the mean (n = 3)	significant differences
CK	27.7401	6.03496	169.905	4.43494		CK	27.7401	1.03946	c
CK	28.7796	6.54383	179.716	4.60139		FR	30.3764	0.707852	b
CK	26.7007	5.52608	160.093	4.26848		FRM	32.5	1.07134	a
FR	30.3764	7.98636	270.134	5.67842
FR	31.0843	8.02627	277.658	6.14807
FR	29.6686	7.94645	262.61	5.20877
FRM	32.5	11.5524	305.487	7.33706		Treatments	Invertase activity(mg/d/g)	standard error of the mean (n = 3)	significant differences
FRM	33.5713	10.2953	319.768	7.38561		CK	6.03496	0.508878	c
FRM	31.4286	9.03819	291.207	7.28851		FR	7.98636	0.0399136	b
						FRM	10.2953	1.25711	a
						Treatments	Urease activity(ug/d/g)	standard error of the mean (n = 3)	significant differences
						CK	169.905	9.81125	c
						FR	270.134	7.52371	b
						FRM	305.487	14.2806	a
													Fig. 2 Compost and inorganic fertilizer effects on cellulase, invertase, urease and catalase activities in soil. Vertical bars denote the standard error of the mean (n = 3). Different letters a, b and c indicate significant differences between treatments at P < 0.05
						Treatments	Catalase activity(umol/d/g)	standard error of the mean (n = 3)	significant differences
						CK	4.43494	0.166459	c
						FR	5.67842	0.469651	b
						FRM	7.33706	0.0485505	a

## Sheet: Fig. 3
raw data							Mass proportion (%)
Treatments	silt and clay fraction	microaggregate	small macroaggregate	large macroaggregate			Treatments	silt+clay fraction	microaggregate	small macroaggregate	large macroaggregate
CK	12.6107	20.4617	38.5744	28.3532			CK	12.552	20.5028	38.6011	28.344
CK	14.0337	19.4629	37.9279	28.5755			FR	8.80191	18.5848	41.7486	30.8647
CK	11.0117	21.5839	39.3009	28.1035			FRM	4.00715	11.4111	43.5791	41.0026
FR	8.9233	18.5439	41.6659	30.867
FR	11.3186	17.7363	40.033	30.9121			standard error of the mean (n = 3)
FR	6.1638	19.4742	43.547	30.815			Treatments	silt+clay fraction	microaggregate	small macroaggregate	large macroaggregate
FRM	5.17851	10.9796	43.1401	40.7018			CK	1.51186	1.06109	0.686897	0.236124
FRM	3.32026	11.8125	41.9228	42.9444			FR	2.57956	0.869694	1.75847	0.0486036
FRM	3.52268	11.4412	45.6744	39.3617			FRM	1.01947	0.417257	1.91394	1.81022
							significant differences between treatments for the same aggregate at P < 0.05
							Treatments	silt+clay fraction	microaggregate	small macroaggregate	large macroaggregate
							CK	a	a	b	c				Fig. 3 Mass proportion (%) of soil aggregates in 0- to 20-cm bulk soil affected by compost and inorganic fertilizer. Vertical bars denote the standard error of the mean (n = 3). Different letters a, b and c indicate significant differences between treatments for the same aggregate at P < 0.05. Different letters w, x, y and z denote significant differences between aggregates for the same treatment…
							FR	a	b	ab	b
							FRM	b	c	a	a
							significant differences between aggregates for the same treatment at P < 0.05
							Treatments	silt+clay fraction	microaggregate	small macroaggregate	large macroaggregate
							CK	z	y	w	x
							FR	z	y	w	x
							FRM	y	x	w	w

## Sheet: Fig. 4
raw data							Organic C concentration(g C/kg)
Treatments	silt and clay fraction	microaggregate	small macroaggregate	large macroaggregate			Treatments	silt and clay fraction	microaggregate	small macroaggregate	large macroaggregate
CK	7.11839	7.42329	7.65845	6.96173			CK	7.11839	7.42329	7.65845	6.96173
CK	7.21969	7.66295	7.8271	7.79337			FR	7.34423	8.38363	8.4999	8.72446
CK	7.01708	7.18363	7.48979	6.13009			FRM	8.28678	9.86992	10.2214	10.3294
FR	7.34423	8.38363	8.4999	8.72446
FR	7.37569	8.65189	8.86883	9.15927			standard error of the mean (n = 3)
FR	7.31277	8.11538	8.13097	8.28966			Treatments	silt and clay fraction	microaggregate	small macroaggregate	large macroaggregate
FRM	8.28678	9.8721	10.2214	10.3294			CK	0.101309	0.239662	0.168655	0.831637
FRM	8.44662	9.87537	10.6134	10.7268			F	0.0314575	0.268257	0.368927	0.434804
FRM	8.12694	9.8623	9.82937	9.93188			FM	0.15984	0.00680066	0.392027	0.397481
							significant differences between treatments for the same aggregate at P < 0.05
							Treatments	silt and clay fraction	microaggregate	small macroaggregate	large macroaggregate
							CK	bc	c	c	c					Fig. 4 Soil aggregate-associated organic C in the 0- to 20-cm bulk soil affected by compost and inorganic fertilizer. Vertical bars denote the standard error of the mean (n = 3). Different letters a, b and c indicate significant differences between treatments for the same aggregate at P < 0.05. Different letters w and x denote significant differences between aggregates for the same treatment at P…
							F	b	b	b	b
							FM	a	a	a	a
							significant differences between aggregates for the same treatment at P < 0.05
							Treatments	silt and clay fraction	microaggregate	small macroaggregate	large macroaggregate
							CK	w	w	w	w
							F	x	w	w	w
							FM	x	w	w	w

## Sheet: Fig. 5
	raw data
	Cellulase							Cellulase（mg/d/g)
	Treatments	silt and clay fraction	microaggregate	small macroaggregate	large macroaggregate			Treatments	silt and clay fraction	microaggregate	small macroaggregate	large macroaggregate
	CK	39.8665	35.7431	42.3349	44.3897			CK	39.8665	35.7431	42.3349	44.3897
	CK	40.9887	36.218	43.3196	45.6191			FR	39.043	40.9251	47.5648	48.5644
	CK	38.7443	35.2682	41.3502	43.1603			FRM	41.2759	42.3598	49.2653	49.8985
	FR	39.043	40.9251	47.5648	48.5644
	FR	40.6976	41.3655	47.8597	49.2027			standard error of the mean (n = 3)
	FR	37.3885	40.4846	47.2699	47.9261			Treatments	silt and clay fraction	microaggregate	small macroaggregate	large macroaggregate
	FRM	41.2759	42.3598	49.2653	49.8985			CK	1.12219	0.47492	0.984693	1.22943
	FRM	42.1326	43.8267	50.33	50.9633			FR	1.65456	0.44045	0.29491	0.638333
	FRM	40.4193	40.8929	48.2005	48.8338			FRM	0.856643	1.46689	1.06474	1.06474
								significant differences between treatments for the same aggregate at P < 0.05
								Treatments	silt and clay fraction	microaggregate	small macroaggregate	large macroaggregate
								CK	a	b	c	b
								FR	a	a	b	a
								FRM	a	a	a	a
								significant differences between aggregates for the same treatment at P < 0.05
								Treatments	silt and clay fraction	microaggregate	small macroaggregate	large macroaggregate
								CK	y	z	x	w
								FR	y	x	w	w
								FRM	x	x	w	w
								Invertase（mg/d/g)
	raw data							Treatments	silt and clay fraction	microaggregate	small macroaggregate	large macroaggregate
	Invertase							CK	27.8732	27.5212	45.9027	33.9864					Fig. 5 Compost and inorganic fertilizer effects on cellulase, invertase, urease and catalase activities in soil aggregates. Vertical bars denote the standard error of the mean (n = 3). Different letters a, b and c indicate significant differences between treatments at P < 0.05. Different letters w, x, y and z denote significant differences between aggregates for the same treatment at P < 0.05
	Treatments	silt and clay fraction	microaggregate	small macroaggregate	large macroaggregate			FR	26.1324	29.735	37.3701	24.622
	CK	27.8732	27.5212	45.9027	33.9864			FRM	38.6634	30.6326	27.5726	21.1058
	CK	27.9466	28.6351	47.2083	36.7037
	CK	27.7998	26.4074	44.5971	31.2691			standard error of the mean (n = 3)
	FR	26.1324	29.735	37.3701	24.622			CK	0.07344	1.11384	1.3056	2.71728
	FR	26.6302	30.9468	39.0918	25.0096			FR	0.49776	1.21176	1.72176	0.3876
	FR	25.6346	28.5233	35.6483	24.2344			FRM	3.68424	1.224	2.0196	0.98736
	FRM	38.6634	30.6326	27.5726	21.1058
	FRM	42.3477	31.8566	29.5922	22.0932			significant differences between treatments for the same aggregate at P < 0.05
	FRM	34.9792	29.4086	25.553	20.1185			CK	b	b	a	a
								FR	b	a	b	b
								FRM	a	a	c	c
								significant differences between aggregates for the same treatment at P < 0.05
								CK	y	y	w	x
								FR	y	x	w	y
								FRM	w	x	x	y
								Urease(ug/d/g)
	raw data							Treatments	silt and clay fraction	microaggregate	small macroaggregate	large macroaggregate
	Urease							CK	257.371	225.402	304.384	360.8
	Treatments	silt and clay fraction	microaggregate	small macroaggregate	large macroaggregate			FR	248.362	207.821	340.792	371.23
	CK	257.371	225.402	304.384	360.8			FRM	205.678	181.581	403.309	440.438
	CK	270.403	231.699	310.065	371.034
	CK	244.338	219.104	298.703	350.566			standard error of the mean (n = 3)
	FR	248.362	207.821	340.792	371.23			CK	13.0325	6.2976	5.68096	10.2336
	FR	258.398	211.232	341.317	375.691			FR	10.0368	3.4112	0.5248	4.4608
	FR	238.325	204.41	340.267	366.77			FRM	11.5194	7.29472	12.2016	7.37344
	FRM	205.678	181.581	403.309	440.438
	FRM	217.197	188.876	415.51	447.812			significant differences between treatments for the same aggregate at P < 0.05
	FRM	194.159	174.286	391.107	433.065			CK	a	a	c	b
								FR	a	b	b	b
								FRM	b	c	a	a
								significant differences between aggregates for the same treatment at P < 0.05
								CK	y	z	x	w
								FR	y	z	x	w
								FRM	y	z	x	w
								Catalase(umol/d/g)
	raw data							Treatments	silt and clay fraction	microaggregate	small macroaggregate	large macroaggregate
	Catalase							CK	11.0451	11.4304	18.0213	10.522
	Treatments	silt and clay fraction	microaggregate	small macroaggregate	large macroaggregate			FR	10.1648	9.3687	17.556	12.914
	CK	11.0451	11.4304	18.0213	10.522			FRM	12.8898	12.5532	17.9674	13.6092
	CK	11.5764	11.8693	20.7438	12.7578
	CK	10.5138	10.9915	15.2988	8.2863			standard error of the mean (n = 3)
	FR	10.1648	9.3687	17.556	12.914			CK	0.5313	0.4389	2.7225	2.23575
	FR	10.871	10.2399	18.4866	13.2803			FR	0.7062	0.8712	0.9306	0.3663
	FR	9.45862	8.4975	16.6254	12.5477			FRM	2.1549	3.7554	0.4851	0.2244
	FRM	12.8898	12.5532	17.9674	13.6092
	FRM	15.0447	16.3086	18.4525	13.8336			significant differences between treatments for the same aggregate at P < 0.05
	FRM	10.7349	8.7978	17.4823	13.3848			CK	a	a	a	b
								FR	b	a	a	ab
								FRM	a	a	a	a
								significant differences between aggregates for the same treatment at P < 0.05
								CK	x	x	w	x
								FR	y	y	w	x
								FRM	x	x	w	x

## Sheet: Fig. 6
raw data
Fig.6 A
Treatments	Cellulase	Invertase	Urease	Catalase
CK	27.7401	6.03496	169.905	4.43494
CK	28.7796	6.54383	179.716	4.60139
CK	26.7007	5.52608	160.093	4.26848
FR	30.3764	7.98636	270.134	5.67842
FR	31.0843	8.02627	277.658	6.14807
FR	29.6686	7.94645	262.61	5.20877
FRM	32.5	11.5524	305.487	7.33706
FRM	33.5713	10.2953	319.768	7.38561
FRM	31.4286	9.03819	291.207	7.28851
raw data
Fig.6 B
Treatments	A	B	C	D
CK	12.6107	20.4617	38.5744	28.3532
CK	14.0337	19.4629	37.9279	28.5755
CK	11.0117	21.5839	39.3009	28.1035
FR	8.9233	18.5439	41.6659	30.867
FR	11.3186	17.7363	40.033	30.9121
FR	6.1638	19.4742	43.547	30.815
FRM	5.17851	10.9796	43.1401	40.7018
FRM	3.32026	11.8125	41.9228	42.9444								Fig. 6 Redundancy analysis (RDA) relating organic C, mass proportion of aggregates or enzyme activities to different fertilization treatments in 0- to 20-cm bulk soil. CK, FR and FRM indicate no fertilizer, chemical fertilizer application alone and the substitution of compost for fertilizer, respectively. A, B, C and D indicate the mass proportion of the silt and clay fraction (<53 μm), microaggr…
FRM	3.52268	11.4412	45.6744	39.3617
raw data
Fig.6 C
Treatments	OC	CA	CB	CC	CD	mSC	53f	MSC	250f	250c
CK	8.61	7.11839	7.42329	7.65845	6.96173	7.31217	11.0456	8.75732	7.62004	11.6385
CK	8.84	7.21969	7.66295	7.8271	7.79337	7.66913	11.6335	9.32331	7.95058	11.9423
CK	8.38	7.01708	7.18363	7.48979	6.13009	6.95521	10.4576	8.19132	7.2895	11.3346
FR	9.31974	7.34423	8.38363	8.4999	8.72446	7.85674	12.3774	9.39024	9.02442	11.8006
FR	9.61185	7.37569	8.65189	8.86883	9.15927	8.23094	12.6565	9.69032	9.12249	11.9895
FR	9.02763	7.31277	8.11538	8.13097	8.28966	7.48253	12.0983	9.09017	8.92635	11.6118
FRM	12.153	8.28678	9.8721	10.2214	10.3294	9.33707	13.7142	11.425	12.3722	12.025
FRM	12.6123	8.44662	9.87537	10.6134	10.7268	9.55167	13.9904	11.5534	12.5888	12.3358
FRM	11.6937	8.12694	9.8623	9.82937	9.93188	8.53809	13.438	11.2967	12.1556	11.7142
raw data
Fig.6 D
Treatments	CellulaseA	CellulaseB	CellulaseC	CellulaseD	InvertaseA	InvertaseB	InvertaseC	InvertaseD	UreaseA	UreaseB	UreaseC	UreaseD	CatalaseA	CatalaseB	CatalaseC	CatalaseD
CK	39.8665	35.7431	42.3349	44.3897	27.8732	27.5212	45.9027	33.9864	257.371	225.402	304.384	360.8	11.0451	11.4304	18.0213	10.522
CK	40.9887	36.218	43.3196	45.6191	27.9466	28.6351	47.2083	36.7037	270.403	231.699	310.065	371.034	11.5764	11.8693	20.7438	12.7578
CK	38.7443	35.2682	41.3502	43.1603	27.7998	26.4074	44.5971	31.2691	244.338	219.104	298.703	350.566	10.5138	10.9915	15.2988	8.2863
FR	39.043	40.9251	47.5648	48.5644	26.1324	29.735	37.3701	24.622	248.362	207.821	340.792	371.23	10.1648	9.3687	17.556	12.914
FR	40.6976	41.3655	47.8597	49.2027	26.6302	30.9468	39.0918	25.0096	258.398	211.232	341.317	375.691	10.871	10.2399	18.4866	13.2803
FR	37.3885	40.4846	47.2699	47.9261	25.6346	28.5233	35.6483	24.2344	238.325	204.41	340.267	366.77	9.45862	8.4975	16.6254	12.5477
FRM	41.2759	42.3598	49.2653	49.8985	38.6634	30.6326	27.5726	21.1058	205.678	181.581	403.309	440.438	12.8898	12.5532	17.9674	13.6092
FRM	42.1326	43.8267	50.33	50.9633	42.3477	31.8566	29.5922	22.0932	217.197	188.876	415.51	447.812	15.0447	16.3086	18.4525	13.8336
FRM	40.4193	40.8929	48.2005	48.8338	34.9792	29.4086	25.553	20.1185	194.159	174.286	391.107	433.065	10.7349	8.7978	17.4823	13.3848

## Sheet: Table 1
								Table 1 Organic C (g C/kg aggregate) in subfractions within macroaggregates and microaggregates in the 0- to 20-cm soil layer affected by compost and inorganic fertilizer.
raw data								Treatments	Microaggregates (53–250 μm)			Macroaggregates (>250 μm)
Treatments	mSC	53f	MSC	250f	250c				silt + clay subfraction (mSC, <53 μm)	fine iPOM (53f, 53–250 μm)		silt + clay subfraction (MSC, <53 μm)	fine iPOM (250f, 53–250 μm)	Coarse iPOM (250c,>250 μm)
CK	7.31217	11.0456	8.75732	7.62004	11.6385			CK	7.31±0.36b	11.05±0.59c		8.76±0.57b	7.62±0.33c	11.64±0.3a
CK	7.66913	11.6335	9.32331	7.95058	11.9423			FR	7.86±0.37b	12.38±0.28b		9.39±0.3b	9.02±0.1b	11.8±0.19a
CK	6.95521	10.4576	8.19132	7.2895	11.3346			FRM	9.14±0.53a	13.71±0.28a		11.43±0.13a	12.37±0.22a	12.02±0.31a
FR	7.85674	12.3774	9.39024	9.02442	11.8006			Values are means (n = 3) with standard error. Different letters within the same column indicate significant differences between treatments at P < 0.05.
FR	8.23094	12.6565	9.69032	9.12249	11.9895
FR	7.48253	12.0983	9.09017	8.92635	11.6118
FRM	9.33707	13.7142	11.425	12.3722	12.025
FRM	9.55167	13.9904	11.5534	12.5888	12.3358
FRM	8.53809	13.438	11.2967	12.1556	11.7142

## Sheet: Table 2
													Table 2 Relationships between organic C contents in physical subfractions (y) and mass proportion (%) of soil aggregates (x) in the 0- to 20-cm layer
raw data													C fraction	Silt and clay fraction			Microaggregates			Small macroaggregates			Large macroaggregates
Treatments	Soil organic C(g/kg)	mSC	53f	MSC	250f	250c	silt and clay fraction	microaggregate	small macroaggregate	large macroaggregate				(<53 μm)			(53-250 μm)			(250-2000 μm)			(>2000 μm)
CK	8.61	7.31217	11.0456	8.75732	7.62004	11.6385	12.6107	20.4617	38.5744	28.3532				Equation	R2		Equation	R2		Equation	R2		Equation	R2
CK	8.84	7.66913	11.6335	9.32331	7.95058	11.9423	14.0337	19.4629	37.9279	28.5755			OC	y=0.04x2-x+15.08	0.73		y=0.02x2-1.15x+22	0.91*		y=0.01x2-0.09x+0.87	0.69		y=-0.002x2+0.41x-2	0.99**
CK	8.38	6.95521	10.4576	8.19132	7.2895	11.3346	11.0117	21.5839	39.3009	28.1035			mSC	y=-1.16ln(x)+10.45	0.51		y=-2.73ln(x)+16	0.7		y=0.32x-5.08	0.84*		y=0.14x+3.32	0.88*
FR	9.31974	7.85674	12.3774	9.39024	9.02442	11.8006	8.9233	18.5439	41.6659	30.867			53f	y=-1.73ln(x)+15.87	0.62		y=-0.24x+16.47	0.72		y=-0.04x2+4.02x-80	0.89*		y=-0.02x2+1.61x-18	0.91**
FR	9.61185	8.23094	12.6565	9.69032	9.12249	11.9895	11.3186	17.7363	40.033	30.9121			MSC	y=0.041x2-0.93x+14	0.73		y=0.03x2-1.24x+22	0.87*		y=0.41x-6.91	0.69		y=0.21x+2.99	0.93**
FR	9.02763	7.48253	12.0983	9.09017	8.92635	11.6118	6.1638	19.4742	43.547	30.815			250f	y=-3.47ln(x)+16.65	0.81*		y=-0.49x+17.84	0.93**		y=28.40ln(x)-95.95	0.68		y=-0.02x2+1.72x-26	0.99**
FRM	12.153	9.33707	13.7142	11.425	12.3722	12.025	5.17851	10.9796	43.1401	40.7018			250c	y=0.01x2-0.11x+12	0.11		y=0.01x2-0.26x+14	0.23		y=0.1x+7.81	0.73		y=0.03x+10.75	0.42
FRM	12.6123	9.55167	13.9904	11.5534	12.5888	12.3358	3.32026	11.8125	41.9228	42.9444			* and ** indicate regression analysis reached significance at P < 0.01 and P < 0.05, respectively.
FRM	11.6937	8.53809	13.438	11.2967	12.1556	11.7142	3.52268	11.4412	45.6744	39.3617			OC denotes the organic C content in 0- to 20-cm bulk soil. MSC, 250f and 250c denote the respective silt + clay subfraction, fine iPOM and coarse iPOM-associated C within macroaggregates. mSC and 53f denote the respective silt + clay subfraction and fine iPOM-associated C within microaggregates

## Sheet: Table 3
	raw data
	Treatments	Cellulase activity(mg/d/g)	Invertase activity(mg/d/g)	Urease activity(ug/d/g)	Catalase activity(umol/d/g)	silt and clay fraction	microaggregate	small macroaggregate	large macroaggregate			Table 3 Relationships between cellulases, invertase, urease and catalase activities (y) and mass proportion (%) of soil aggregates (x) in the 0- to 20-cm layer
	CK	27.7401	6.03496	169.905	4.43494	12.6107	20.4617	38.5744	28.3532			Enzyme activity	Silt and clay fraction (<53 μm)			Microaggregates (53-250 μm)			Small macroaggregates (250-2000 μm)			Large macroaggregates (>2000 μm)
	CK	28.7796	6.54383	179.716	4.60139	14.0337	19.4629	37.9279	28.5755				Equation	R2		Equation	R2		Equation	R2		Equation	R2
	CK	26.7007	5.52608	160.093	4.26848	11.0117	21.5839	39.3009	28.1035			Cellulase	y = 0.01x2-0.62x+34.31	0.53		y=-0.01x2+0.03x+33.95	0.63		y=34.77ln(x)-99.12	0.93**		y=-0.03x2+2.46x-17.38	0.84*
	FR	30.3764	7.98636	270.134	5.67842	8.9233	18.5439	41.6659	30.867			Invertase	y=-2.79ln(x)+13.73	0.61		y=-0.02x2+0.29x+9.77	0.75		y=29.36ln(x)-101.09	0.85*		y=11.03ln(x)-30.46	0.89*
	FR	31.0843	8.02627	277.658	6.14807	11.3186	17.7363	40.033	30.9121			Urease	y=-0.74x2+0.11x+312	0.67		y=-2.08x2+54.18x-42.67	0.71		y=-2.96x2+268.06x-5760	0.91**		y=-1.61x2+122.47x-1992	0.86*
	FR	29.6686	7.94645	262.61	5.20877	6.1638	19.4742	43.547	30.815			Catalase	y=-1.97ln(x)+9.78	0.71		y=-4.26ln(x)+17.70	0.83*		y=-0.04x2+3.66x-79.27	0.82*		y=7.27ln(x)-19.61	0.91**
	FRM	32.5	11.5524	305.487	7.33706	5.17851	10.9796	43.1401	40.7018			* and ** indicate regression analysis reached significance at P < 0.01 and P < 0.05, respectively.
	FRM	33.5713	10.2953	319.768	7.38561	3.32026	11.8125	41.9228	42.9444
	FRM	31.4286	9.03819	291.207	7.28851	3.52268	11.4412	45.6744	39.3617
